# Supplementary material for: Measuring Race and Ancestry in the Age of Genetic Testing
Source: Oxford University Press journal article supplement (doi:10.1215/00703370-9142013), 2021-04-12
Supplement: johfre_esm.pdf [file johfre_esm.pdf]

# MEASURING RACE AND ANCESTRY IN THE AGE OF GENETIC TESTING

By Sasha Shen Johfre, Aliya Saperstein, and Jill A. Hollenbach

## ONLINE APPENDIX

In this supplement, we first discuss the details of our propensity-score matching approach to estimate who reports multiple races for self-identification, while accounting for potential selectivity in who takes a genetic ancestry test (GAT). We also present various supplementary tables and figures, numbered according to where they are first referenced in the main text.

### Propensity-score matching

In our propensity-score matching approach, we constructed a propensity score by estimating the likelihood of having taken a GAT (see Table A3) using the following categorical predictors: a series of indicators for each type of genealogical research (other than GAT-taking), age, education, region of residence, nativity (U.S. vs. foreign born), and recruitment variables (as a measure of eagerness to participate in genetic ancestry research). These measures in our data were found to be significant predictors of professed (dis)interest in GATs in previous research (Horowitz, Saperstein, Little, Maiers, & Hollenbach, 2019). Using Stata's *psmatch2*, we nearest-neighbor matched our full sample on this propensity score to compare people with similar demographic backgrounds. Our specification achieved sufficient overlap and balance (see Figure A2). Results from our propensity score models were extremely similar in magnitude and significance to results from logistic regression (see Table A4), which suggests that selection into GAT-taking based on these observed factors are not driving our results.

To examine the possibility of unobserved selectivity causing both GAT-taking and the reporting patterns of interest, we ran sensitivity analyses on our p-score models using the Mantel-Haenszel bounds method (Stata's *mhbounds*), which models how strong the association with an unobserved confounder would need to be in order to invalidate the matching results (Becker & Caliendo, 2007; Mantel & Haenszel, 1959). A robust result would indicate that the treatment and outcome are directly causally linked (rather than both caused by a third variable); a sensitive result leaves this question open. When predicting multiracial reporting, our analyses indicated that the p-score model results are somewhat sensitive to potential unobserved confounders. In particular, the estimated average treatment effect would no longer be significant if the odds of differential assignment due to a positively-biased confounder were above 1.15 (see Table A5). Thus, if there is an unobserved confounder that increases the odds of taking a GAT by 15% conditional on the observed covariates (and also causes higher rates of multiple-race reporting), our result may overestimate the true association between taking a GAT and multiracial identification.

One such likely confounder is awareness of racial diversity in one's family history. Although we can measure this in our survey using the number of reported ancestries a respondent selects, for GAT takers it is a post-treatment measure; we do not know the ancestral diversity respondents would have reported prior to taking a GAT. Further, we cannot include reported ancestry counts in our propensity score (or logit) models because of the risk of collider

bias (as it also is related to multiracial reporting, our outcome of interest). This means we cannot definitively rule out the opposite causal interpretation of our results: that people who believe they have mixed ancestry are more likely to take a GAT and are therefore also more likely to report multiple races for self-identification after the fact. As noted in our discussion, we are not overly troubled by this because we expect that causality between GAT-taking and racial identification does run in both directions.

## REFERENCES

- Becker, S. O., & Caliendo, M. (2007). Sensitivity Analysis for Average Treatment Effects. *The Stata Journal: Promoting Communications on Statistics and Stata*, 7(1), 71–83.
- Horowitz, A. L., Saperstein, A., Little, J., Maier, M., & Hollenbach, J. A. (2019). Consumer (dis-)interest in genetic ancestry testing: the roles of race, immigration, and ancestral certainty. *New Genetics and Society*, 1–30.
- Mantel, N., & Haenszel, W. (1959). Statistical Aspects of the Analysis of Data From Retrospective Studies of Disease. *Journal of the National Cancer Institute*, 22(4), 719–748.

TABLE A1: Correspondence between races and ancestries drawn from official racial category definitions provided by OMB (1997) used to create a measure of race-unique ancestries.

| Race responses           | White                                                                                                                                                                                         | Black                                                                                              | Asian                                                                                                         | Hispanic or Latino                                                           | Native Hawaiian or Pacific Islander (NHPI)                          | American Indian                                                     |
|--------------------------|-----------------------------------------------------------------------------------------------------------------------------------------------------------------------------------------------|----------------------------------------------------------------------------------------------------|---------------------------------------------------------------------------------------------------------------|------------------------------------------------------------------------------|---------------------------------------------------------------------|---------------------------------------------------------------------|
| Corresponding Ancestries | <ul style="list-style-type: none"> <li>• Western Europe</li> <li>• Eastern Europe</li> <li>• Southern Europe</li> <li>• Scandinavia</li> <li>• North Africa</li> <li>• Middle-East</li> </ul> | <ul style="list-style-type: none"> <li>• Sub-Saharan Africa</li> <li>• African American</li> </ul> | <ul style="list-style-type: none"> <li>• East Asia</li> <li>• Southeast Asia</li> <li>• South Asia</li> </ul> | <ul style="list-style-type: none"> <li>• Central or South America</li> </ul> | <ul style="list-style-type: none"> <li>• Pacific Islands</li> </ul> | <ul style="list-style-type: none"> <li>• American Indian</li> </ul> |

TABLE A2: Descriptive sample comparison to the American Community Survey

| Percent of sample in demographic categories |            |      |       |          |
|---------------------------------------------|------------|------|-------|----------|
|                                             | Our survey |      |       | 2015 ACS |
|                                             | No GAT     | GAT  | Total |          |
| <b>Sex</b>                                  |            |      |       |          |
| Female                                      | 79.8       | 77.0 | 79.6  | 50.3     |
| <b>Nativity</b>                             |            |      |       |          |
| Foreign-born                                | 7.1        | 6.4  | 7.0   | 17.2     |
| <b>Age</b>                                  |            |      |       |          |
| 18 to 24                                    | 13.4       | 8.8  | 13.1  | 15.6     |
| 25 to 34                                    | 34.3       | 31.7 | 34.2  | 21.8     |
| 35 to 44                                    | 26.9       | 28.6 | 27.0  | 20.4     |
| 45 to 54                                    | 17.5       | 20.2 | 17.6  | 21.6     |
| 55 to 64                                    | 7.9        | 10.7 | 8.1   | 20.5     |
| <b>Education</b>                            |            |      |       |          |
| Did not finish high school                  | 0.4        | 0.3  | 0.4   | 11.9     |
| High school grad                            | 18.2       | 11.9 | 17.9  | 51.1     |
| Associate's degree                          | 15.6       | 12.2 | 15.4  | 8.4      |
| Bachelor's degree                           | 37.0       | 38.5 | 37.1  | 18.7     |
| Grad/Professional degree                    | 28.8       | 37.1 | 29.3  | 9.9      |
| <b>Region</b>                               |            |      |       |          |
| Midwest                                     | 23.9       | 19.6 | 23.7  | 21.0     |
| Northeast                                   | 17.0       | 17.5 | 17.0  | 17.8     |
| South                                       | 34.6       | 33.0 | 34.5  | 37.5     |
| West                                        | 24.5       | 29.9 | 24.8  | 23.8     |

Note: ACS percentages shown are unweighted. Both samples are restricted to 18-64 year-olds to match age restrictions in the marrow donor registry.

TABLE A3: Probit regression predicting whether or not a person took a GAT, as used in propensity-score matching

|                                                                        | Coefficient | Std. Err. | z      | P>z   | [95% Conf. | Interval]  |
|------------------------------------------------------------------------|-------------|-----------|--------|-------|------------|------------|
| <b>Female</b>                                                          | -0.0810682  | 0.0167283 | -4.85  | 0     | -0.113855  | -0.0482814 |
| <b>Foreign born</b> (ref = US-born)                                    | 0.0596321   | 0.0279307 | 2.14   | 0.033 | 0.0048889  | 0.1143754  |
| <b>Age</b> (ref = 55 to 64)                                            |             |           |        |       |            |            |
| 18 to 24                                                               | -0.131413   | 0.0318468 | -4.13  | 0     | -0.1938317 | -0.0689944 |
| 25 to 34                                                               | -0.0738521  | 0.0259685 | -2.84  | 0.004 | -0.1247494 | -0.0229548 |
| 35 to 44                                                               | -0.0560388  | 0.026243  | -2.14  | 0.033 | -0.1074742 | -0.0046034 |
| 45 to 54                                                               | -0.0386863  | 0.0276663 | -1.4   | 0.162 | -0.0929113 | 0.0155387  |
| <b>Education</b> (ref = grad/professional degree)                      |             |           |        |       |            |            |
| Did not finish HS                                                      | -0.2248703  | 0.1235671 | -1.82  | 0.069 | -0.4670573 | 0.0173168  |
| High School                                                            | -0.3136075  | 0.0226788 | -13.83 | 0     | -0.3580571 | -0.2691579 |
| Associate's Degree                                                     | -0.2628131  | 0.0226472 | -11.6  | 0     | -0.3072008 | -0.2184255 |
| Bachelor's Degree                                                      | -0.0941044  | 0.0165077 | -5.7   | 0     | -0.1264589 | -0.0617498 |
| <b>Region</b> (ref = Northeast)                                        |             |           |        |       |            |            |
| Midwest                                                                | -0.102572   | 0.0225018 | -4.56  | 0     | -0.1466747 | -0.0584693 |
| South                                                                  | -0.0523612  | 0.0205039 | -2.55  | 0.011 | -0.092548  | -0.0121744 |
| West                                                                   | 0.0856628   | 0.0211371 | 4.05   | 0     | 0.0442349  | 0.1270908  |
| <b>Genealogical research activity</b> (ref = none of these activities) |             |           |        |       |            |            |
| Ask family member                                                      | -0.2754475  | 0.0233802 | -11.78 | 0     | -0.321272  | -0.2296231 |
| Viewed family documents                                                | 0.090811    | 0.0158558 | 5.73   | 0     | 0.0597341  | 0.1218878  |
| Visited genealogy website                                              | 0.6003552   | 0.0153723 | 39.05  | 0     | 0.5702261  | 0.6304844  |
| Sent away for official documents                                       | 0.45826     | 0.0212249 | 21.59  | 0     | 0.41666    | 0.49986    |
| Went to a library                                                      | 0.1481232   | 0.0216035 | 6.86   | 0     | 0.1057811  | 0.1904652  |
| Other behaviors                                                        | 0.4968048   | 0.02986   | 16.64  | 0     | 0.4382803  | 0.5553294  |
| <b>Response timing</b> (ref = initial email)                           |             |           |        |       |            |            |
| Reminder email                                                         | -0.0294413  | 0.0183116 | -1.61  | 0.108 | -0.0653314 | 0.0064488  |
| Second reminder email                                                  | -0.1087172  | 0.0193338 | -5.62  | 0     | -0.1466108 | -0.0708236 |
| <b>Long recruitment email</b> (ref = short recruitment email)          | -0.0183411  | 0.0139074 | -1.32  | 0.187 | -0.0455991 | 0.0089168  |
| Constant                                                               | -1.502601   | 0.0387851 | -38.74 | 0     | -1.578618  | -1.426583  |

Note: n = 100,885.

TABLE A4: Results from propensity-score matching predicting multiple-race reporting

| Sample    | Treated | Controls | Difference     | S.E.     | T-stat |
|-----------|---------|----------|----------------|----------|--------|
| Unmatched | 0.1430  | 0.1132   | 0.02979        | 0.004435 | 6.72   |
| ATT       | 0.1430  | 0.1161   | <b>0.02691</b> | 0.009262 | 2.91   |
| ATU       | 0.1132  | 0.1599   | 0.04665        | .        | .      |
| ATE       |         |          | 0.04559        | .        | .      |

Note: N = 100,885. Standard errors shown do not take into account that the propensity score is estimated.

TABLE A5: Mantel-Haenszel bounds sensitivity analyses for propensity scoring matching model predicting multiple race reporting

| Gamma | Q mh+    | Q mh-   | p mh+    | p mh-    |
|-------|----------|---------|----------|----------|
| 1     | 3.10978  | 3.10978 | 0.000936 | 0.000936 |
| 1.05  | 2.45298  | 3.76828 | 0.007084 | 0.000082 |
| 1.1   | 1.82741  | 4.39728 | 0.033819 | 5.50E-06 |
| 1.15  | 1.23026  | 4.99978 | 0.1093   | 2.90E-07 |
| 1.2   | 0.658907 | 5.57815 | 0.254978 | 1.20E-08 |
| 1.25  | 0.111069 | 6.13447 | 0.455781 | 4.30E-10 |
| 1.3   | 0.340627 | 6.67056 | 0.366692 | 1.30E-11 |
| 1.35  | 0.847039 | 7.18801 | 0.198487 | 3.30E-13 |
| 1.4   | 1.33522  | 7.68825 | 0.090902 | 7.40E-15 |
| 1.45  | 1.80655  | 8.17254 | 0.035416 | 1.10E-16 |
| 1.5   | 2.26225  | 8.64201 | 0.011841 | 0        |

Gamma : odds of differential assignment due to unobserved factors

Q\_mh+ : Mantel-Haenszel statistic (assumption: overestimation of treatment effect)

Q\_mh- : Mantel-Haenszel statistic (assumption: underestimation of treatment effect)

p\_mh+ : significance level (assumption: overestimation of treatment effect)

p\_mh- : significance level (assumption: underestimation of treatment effect)

TABLE A6: Logistic Regression Predicting American Indian Ancestry Reporting Among Respondents Who Identified as White (Odds Ratios)

|                                                                                | (1)                 | (2)                 | (3)                 | (4)                 |
|--------------------------------------------------------------------------------|---------------------|---------------------|---------------------|---------------------|
| <b>Taken a GAT</b><br>(ref = no GAT)                                           | 0.832***<br>(0.036) | 0.795***<br>(0.035) | 0.869*<br>(0.057)   | 0.878*<br>(0.054)   |
| <b>Ancestry before race condition</b><br>(ref = race before ancestry)          |                     | 0.999<br>(0.019)    | 1.007<br>(0.020)    | 0.999<br>(0.019)    |
| <b>Ancestry before race condition x Taken a GAT</b>                            |                     |                     | 0.853<br>(0.075)    |                     |
| <b>Unprimed condition</b><br>(ref = knowledge prime)                           |                     | 0.988<br>(0.019)    | 0.988<br>(0.019)    | 0.997<br>(0.019)    |
| <b>Unprimed condition x Taken a GAT</b>                                        |                     |                     |                     | 0.822*<br>(0.072)   |
| <b>Genealogical research</b>                                                   |                     |                     |                     |                     |
| <b>Asked family member</b><br>(ref = did not ask family member)                |                     | 1.456***<br>(0.055) | 1.456***<br>(0.056) | 1.455***<br>(0.055) |
| <b>Viewed family documents</b><br>(ref = did not view family documents)        |                     | 1.063**<br>(0.022)  | 1.063**<br>(0.022)  | 1.063**<br>(0.022)  |
| <b>Visited genealogy website</b><br>(ref = did not visit genealogy website)    |                     | 1.199***<br>(0.025) | 1.199***<br>(0.025) | 1.199***<br>(0.025) |
| <b>Sent away for official documents</b><br>(ref = did not send away for docs.) |                     | 1.043<br>(0.038)    | 1.043<br>(0.038)    | 1.043<br>(0.038)    |
| <b>Went to a library</b><br>(ref = did not go to a library)                    |                     | 1.160***<br>(0.039) | 1.160***<br>(0.039) | 1.161***<br>(0.039) |
| <b>Other research activities</b><br>(ref = did not do other research)          |                     | 1.230***<br>(0.062) | 1.229***<br>(0.062) | 1.231***<br>(0.062) |
| <b>Female</b><br>(ref = male)                                                  |                     | 1.247***<br>(0.031) | 1.247***<br>(0.031) | 1.247***<br>(0.031) |
| <b>Foreign born</b><br>(ref = US born)                                         |                     | 0.396***<br>(0.027) | 0.396***<br>(0.027) | 0.396***<br>(0.027) |
| <b>Age</b> (ref = 55-64)                                                       |                     |                     |                     |                     |
| 18 to 24                                                                       |                     | 1.771***<br>(0.082) | 1.771***<br>(0.082) | 1.773***<br>(0.082) |
| 25 to 34                                                                       |                     | 1.881***<br>(0.078) | 1.881***<br>(0.078) | 1.881***<br>(0.078) |

|                                                   |       |                     |                     |                     |
|---------------------------------------------------|-------|---------------------|---------------------|---------------------|
| 35 to 44                                          |       | 1.692***<br>(0.071) | 1.692***<br>(0.071) | 1.693***<br>(0.071) |
| 45 to 54                                          |       | 1.182***<br>(0.053) | 1.182***<br>(0.053) | 1.183***<br>(0.053) |
| <b>Education</b> (ref = Grad/Professional Degree) |       |                     |                     |                     |
| Did not finish HS                                 |       | 1.634**<br>(0.261)  | 1.635**<br>(0.261)  | 1.634**<br>(0.261)  |
| High School                                       |       | 1.618***<br>(0.047) | 1.618***<br>(0.047) | 1.618***<br>(0.047) |
| Associate's Degree                                |       | 1.609***<br>(0.047) | 1.609***<br>(0.047) | 1.610***<br>(0.047) |
| Bachelor's Degree                                 |       | 1.115***<br>(0.028) | 1.115***<br>(0.028) | 1.115***<br>(0.028) |
| <b>Region</b> (ref = Northeast)                   |       |                     |                     |                     |
| Midwest                                           |       | 1.257***<br>(0.042) | 1.257***<br>(0.042) | 1.257***<br>(0.042) |
| South                                             |       | 2.248***<br>(0.069) | 2.248***<br>(0.069) | 2.248***<br>(0.069) |
| West                                              |       | 1.527***<br>(0.051) | 1.527***<br>(0.051) | 1.527***<br>(0.051) |
| Observations                                      | 87070 | 87070               | 87070               | 87070               |

Sample is restricted to respondents who selected "White" as a race response either alone or with another race (results are similar if restricted to monoracial White respondents). Models 2, 3, and 4 also control for recruitment variables (not shown). Standard errors in parentheses.

\* p<0.05 \*\*p<0.01 \*\*\*p<0.001

TABLE A7: Percent of respondents reporting multiple races among those who report multiple race-unique ancestries, by amount of genealogical research (Panels B, C, and D), age category, and whether the respondent took a GAT.

| Panel A. All respondents (n = 22,631) |      |        |       |          | Panel B. Very little research (n = 9,456) |      |        |       |          |
|---------------------------------------|------|--------|-------|----------|-------------------------------------------|------|--------|-------|----------|
|                                       | GAT  | No GAT | Diff. | <i>p</i> |                                           | GAT  | No GAT | Diff. | <i>p</i> |
| 18 to 24                              | 53.8 | 44.8   | 9.1   | 0.0258   | 18 to 24                                  | 65.1 | 45.6   | 19.5  | 0.0114   |
| 25 to 34                              | 51.1 | 38.9   | 12.2  | 0        | 25 to 34                                  | 57.3 | 39.5   | 17.8  | 0.0003   |
| 35 to 44                              | 40.5 | 34.1   | 6.4   | 0.0100   | 35 to 44                                  | 34.7 | 34.3   | 0.4   | 0.9476   |
| 45 to 54                              | 34.9 | 30.9   | 3.9   | 0.2296   | 45 to 54                                  | 40.0 | 30.2   | 9.8   | 0.2477   |
| 55 to 64                              | 43.5 | 29.0   | 14.5  | 0.0036   | 55 to 64                                  | 35.7 | 24.8   | 10.9  | 0.3556   |
| All ages                              | 45.3 | 37.0   | 8.2   | 0        | All ages                                  | 49.2 | 37.4   | 11.8  | 0.0001   |

  

| Panel C. Some research (n = 9,762) |      |        |       |          | Panel D. A lot of research (n = 3,413) |      |        |       |          |
|------------------------------------|------|--------|-------|----------|----------------------------------------|------|--------|-------|----------|
|                                    | GAT  | No GAT | Diff. | <i>p</i> |                                        | GAT  | No GAT | Diff. | <i>p</i> |
| 18 to 24                           | 45.9 | 43.4   | 2.6   | 0.6339   | 18 to 24                               | 61.5 | 46.5   | 15.0  | 0.1377   |
| 25 to 34                           | 49.3 | 38.4   | 10.9  | 0.0003   | 25 to 34                               | 50.0 | 39.0   | 10.9  | 0.0219   |
| 35 to 44                           | 38.2 | 32.9   | 5.3   | 0.1388   | 35 to 44                               | 46.7 | 36.9   | 9.8   | 0.0297   |
| 45 to 54                           | 33.7 | 29.6   | 4.0   | 0.4266   | 45 to 54                               | 34.3 | 35.4   | -1.1  | 0.8355   |
| 55 to 64                           | 44.4 | 28.9   | 15.5  | 0.0516   | 55 to 64                               | 45.2 | 35.8   | 9.4   | 0.2423   |
| All ages                           | 42.6 | 36.2   | 7.4   | 0.0001   | All ages                               | 45.5 | 38.4   | 7.1   | 0.0056   |

TABLE A8: Rates of reporting multiple ancestries, multiple race-unique ancestries, 2 or more races, and 3 or more races among people who have not taken a GAT, took a GAT themselves, or reported that they had not taken a GAT themselves but had seen a relative's results.

|                                        | <b>Took a GAT</b> | <b>Viewed a relative's<br/>GAT results</b> | <b>Did not take a GAT</b> |
|----------------------------------------|-------------------|--------------------------------------------|---------------------------|
| <b>Multiple ancestries</b>             | 3,375 (66.3%)     | 142 (54.6%)                                | 48,684 (54.1%)            |
| <b>Multiple race-unique ancestries</b> | 1,297 (25.4%)     | 53 (20.4%)                                 | 21,281 (23.3%)            |
| <b>Two or more races</b>               | 748 (14.4%)       | 33 (12.5%)                                 | 10,804 (11.3%)            |
| <b>Three or more races</b>             | 167 (3.2%)        | 3 (1.1%)                                   | 1,389 (1.5%)              |

Note: column percentages in parentheses

FIGURE A1: Survey question and response options for ancestry reporting.

*From what countries or parts of the world did your ancestors come?*

Select as many categories from the list below as needed to fully describe the origins of your family. If all of your grandparents were born in the United States, answer based on where your ancestors came from before they arrived in North America.

---

- ☐ Western Europe  
(England, Ireland, France, Germany, The Netherlands, etc.)
- ☐ Southern Europe  
(Italy, Spain, Turkey, etc.)
- ☐ Eastern Europe  
(Czech Republic, Poland, Russia, etc.)
- ☐ Scandinavia  
(Denmark, Norway, Sweden, etc.)
- ☐ East Asia  
(China, Japan, Korea, etc.)
- ☐ South Asia  
(India, Pakistan, Sri Lanka, etc.)
- ☐ Southeast Asia  
(Indonesia, Philippines, Vietnam, etc.)
- ☐ Pacific Islands  
(Hawaii, Guam, Samoa, etc.)
- ☐ Caribbean  
(Cuba, Puerto Rico, Trinidad and Tobago, etc.)
- ☐ Central or South America  
(Mexico, Nicaragua, Peru, etc.)
- ☐ Middle East  
(Iran, Lebanon, Saudi Arabia, etc.)
- ☐ Northern Africa  
(Egypt, Libya, Morocco, etc.)
- ☐ Sub-Saharan Africa  
(Kenya, Nigeria, Zimbabwe, etc.)
- ☐ American Indian  
(Navajo, Mayan, Tlingit, etc.)
- ☐ African American
- ☐ I do not know some, or all, of my family origins

FIGURE A2: Overlap (panel a) and balance (panel b) distributions for our propensity score analysis.

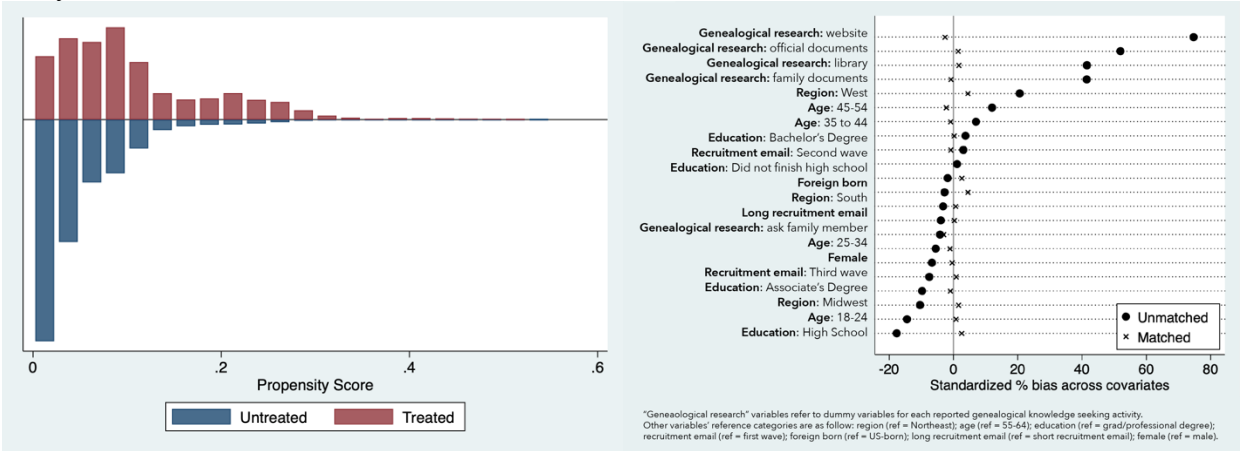

FIGURE A3: Percent who list Sub-Saharan African ancestry among respondents who identified as Black, by nativity and whether they took a GAT.

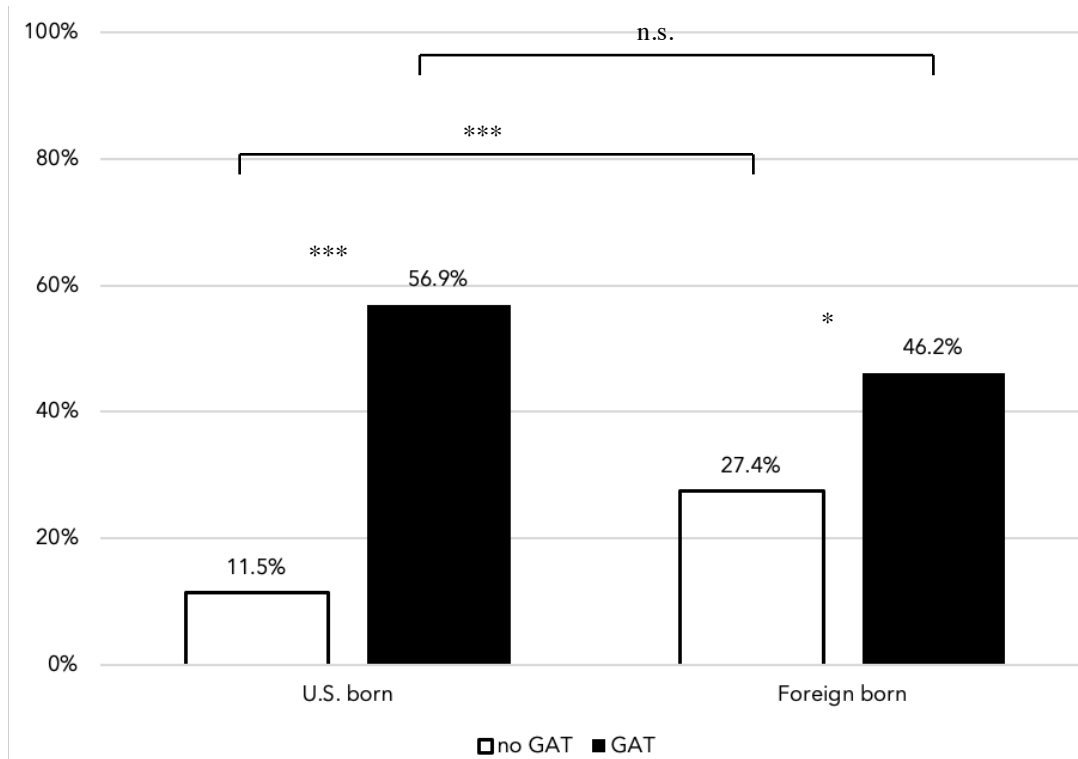

Note: \*  $p < 0.05$  \*\*  $p < 0.01$  \*\*\*  $p < 0.001$

FIGURE A4: Rates of selecting multiple ancestries, multiple race-unique ancestries, and multiple races by whether a respondent has taken a GAT and whether they saw race questions before or after ancestry questions.

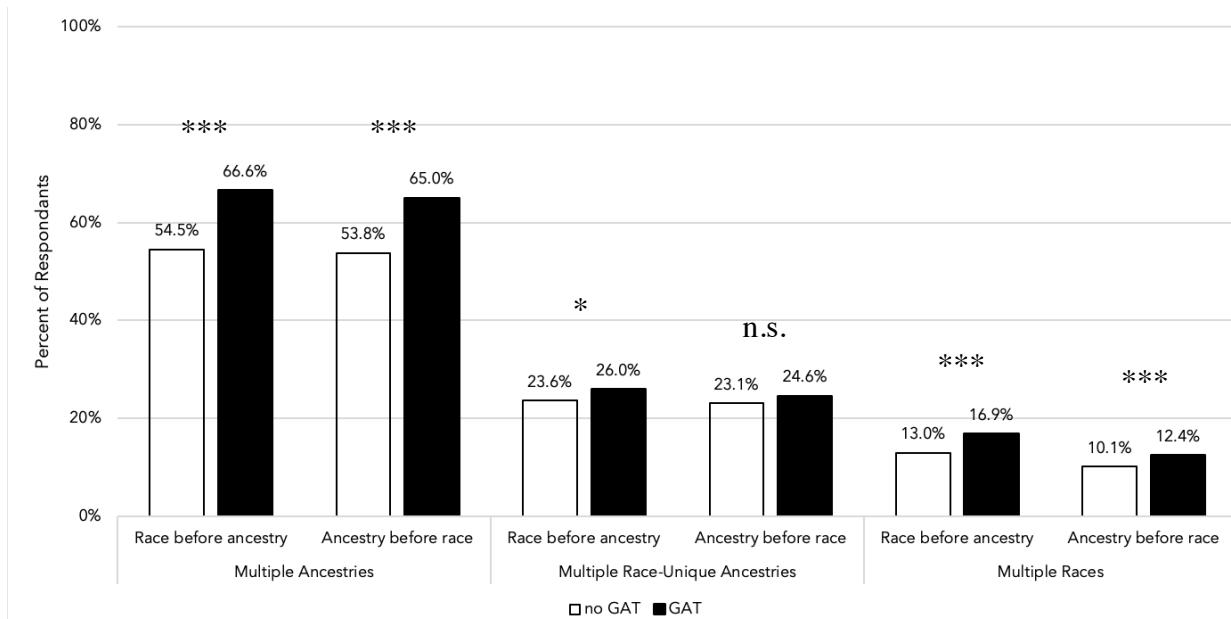

Note: \*  $p < 0.05$  \*\*  $p < 0.01$  \*\*\*  $p < 0.001$
